# Supplementary material for: Usefulness of BATF3 Immunohistochemistry in Diagnosing Classical Hodgkin Lymphoma
Source: MDPI journal article supplement (doi:10.3390/diagnostics11061123), 2021-06-20
Supplement: s1 [file s1]

**Supplementary Materials:** The following are available online at [www.mdpi.com/xxx/s1](http://www.mdpi.com/xxx/s1), Figure S1: Western blot analysis of BATF3 expression in cHL cell lines.

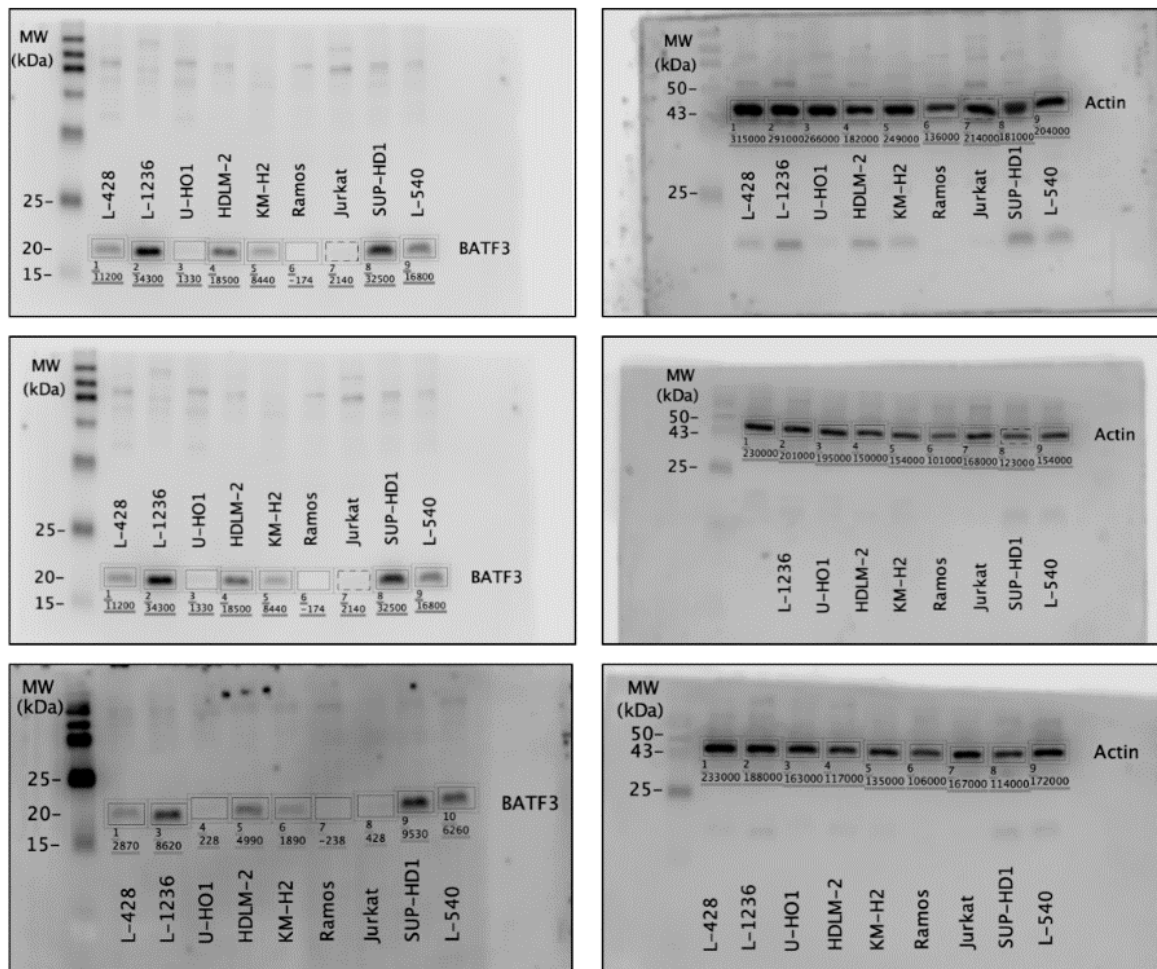

**Figure S1. Western blot analysis of BATF3 expression in cHL cell lines.** Western blots of cell lysates from cHL (L-428, L-1236, U-HO1, HDLM-2, KM-H2, Sup-HD1, L-540), T-LBL/ALL (Jurkat) and BL (Ramos) were probed with anti-BATF3 AB and anti- $\beta$ -actin AB. 3 independent experiments are shown that include densitometry readings/intensity ratio of each band. Anti-BATF3 AB labeled the 17-kDa BATF3-protein in cHL and in T-LBL/ALL, while BL cells were not reactive.
